# Supplementary material for: Copolyimide Brushes as a Component of a Hybrid Poly(phenylene Oxide) Membrane for Controlling Gas Separation: Effect of Water, Methanol, and Hexane Vapors
Source: MDPI journal article supplement (doi:10.3390/membranes13090805), 2023-09-20
Supplement: s1 [file s1]

## Supplementary Materials

# Copolyimide Brushes as a Component of a Hybrid Membrane for Controlling Gas Separation: Effect of Water, Methanol and Hexane Vapors

Nadezhda Tian <sup>1</sup>, Alexandra Pulyalina <sup>1,2,\*</sup>, Ilya Faykov <sup>1</sup>, Iosif Gofman <sup>3</sup>, Konstantin Zolotovskiy <sup>1</sup> and Galina Polotskaya <sup>1,3</sup>

<sup>1</sup> Institute of Chemistry, Saint Petersburg State University, Saint Petersburg 198504, Russia; polotskaya@hq.macro.ru (G.P.)

<sup>2</sup> Nanomaterial Research Center, Kola Science Centre, Russian Academy of Sciences, Apatity 184209, Russia

<sup>3</sup> Institute of Macromolecular Compounds, Russian Academy of Sciences, Saint Petersburg 199004, Russia

\* Correspondence: a.pulyalina@spbu.ru; Tel.: +78-124-284-805

In this work, we followed the specific calculation algorithm as follows:

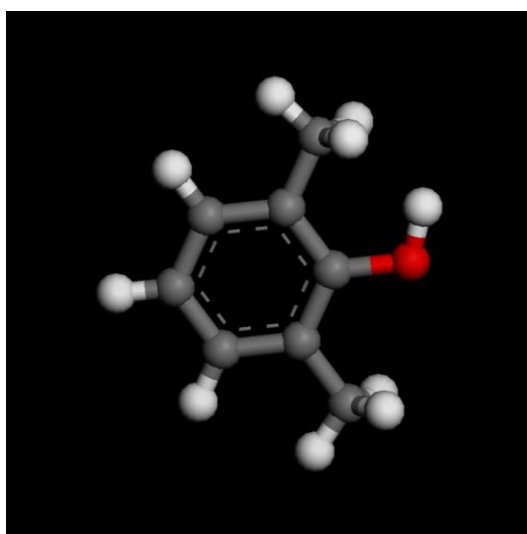

2,6-Xylenol

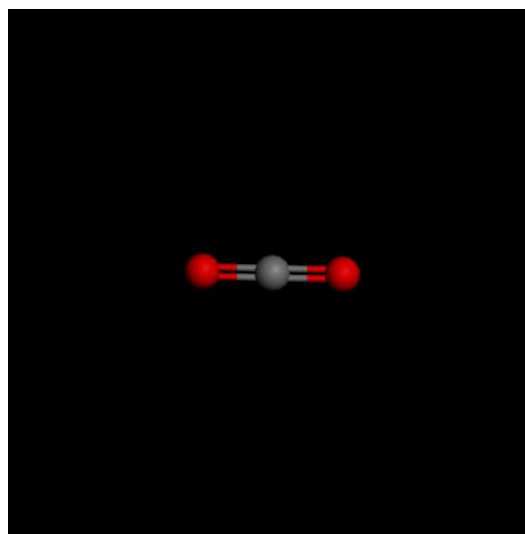

CO<sub>2</sub>

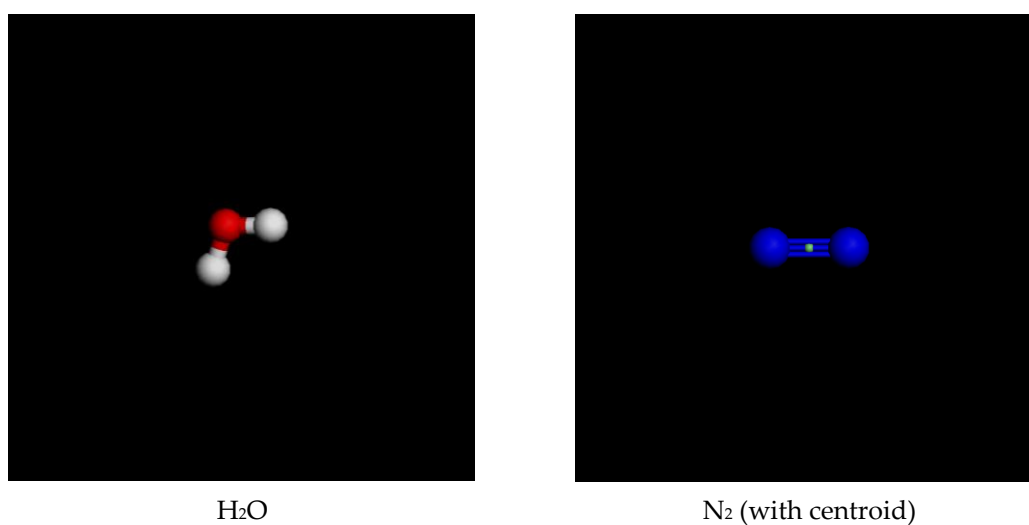

**Figure S1.** Sketch Toolbar — creation of 2,6-Xylenol, CO<sub>2</sub>, N<sub>2</sub> (with centroid), H<sub>2</sub>O molecules.

**Table S1.** Forcite Geometry Optimization — molecular optimization.

| Geometry optimization parameters |                     | Energy parameters    |                 |                         |                 |
|----------------------------------|---------------------|----------------------|-----------------|-------------------------|-----------------|
| Algorithm                        | Smart               | Forcefield           |                 | COMPASSII (Version 1.1) |                 |
| Convergence tolerance            |                     | Charges              |                 | Forcefield assigned     |                 |
| Energy                           | 2e-005<br>kcal/mol  | Electrostatic terms  |                 | van der Waals terms     |                 |
| Force                            | 0.001<br>kcal/mol/Å | Summation<br>method  | Atom<br>based   | Summation<br>method     | Atom<br>based   |
| Displacement                     | 1e-005 Å            | Truncation<br>method | Cubic<br>spline | Truncation<br>method    | Cubic<br>spline |
| Maximum number of<br>iterations  | 500                 | Cutoff distance      | 18.5 Å          | Cutoff distance         | 18.5 Å          |
| Motion groups rigid              | NO                  | Spline width         | 1 Å             | Spline width            | 1 Å             |
|                                  |                     | Buffer width         | 0.5 Å           | Buffer width            | 0.5 Å           |

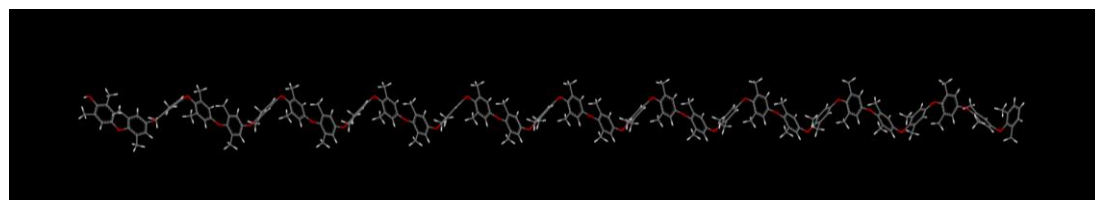

**Figure S2.** Building Homopolymer — creation of an oligomer from 30 monomer units of 2,6-Xylenol.

**Table S2.** Forcite Geometry Optimization — chain optimization.

| Geometry optimization parameters | Energy parameters |
|----------------------------------|-------------------|
|----------------------------------|-------------------|

| Algorithm                    | Smart            | Forcefield          |              | COMPASSII (Version 1.1) |              |
|------------------------------|------------------|---------------------|--------------|-------------------------|--------------|
| Convergence tolerance        |                  | Charges             |              | Forcefield assigned     |              |
| Energy                       | 2e-005 kcal/mol  | Electrostatic terms |              | van der Waals terms     |              |
| Force                        | 0.001 kcal/mol/Å | Summation method    | Atom based   | Summation method        | Atom based   |
| Displacement                 | 1e-005 Å         | Truncation method   | Cubic spline | Truncation method       | Cubic spline |
| Maximum number of iterations | 500              | Cutoff distance     | 18.5 Å       | Cutoff distance         | 18.5 Å       |
| Motion groups rigid          | NO               | Spline width        | 1 Å          | Spline width            | 1 Å          |
|                              |                  | Buffer width        | 0.5 Å        | Buffer width            | 0.5 Å        |

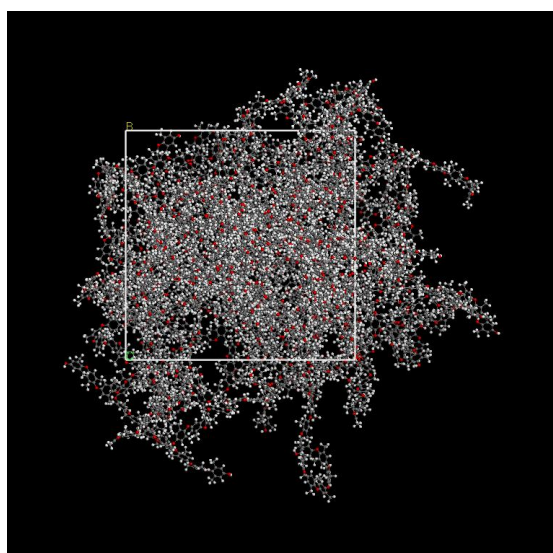

“origin” visualization

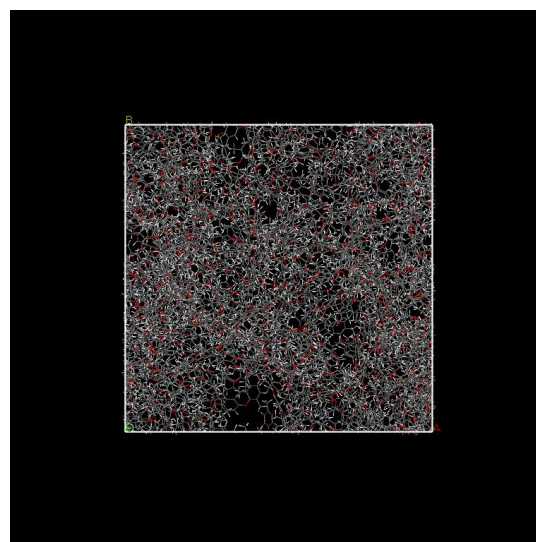

“in-Cell” stick visualization

**Figure S3.** Amorphous Cell Construction — creation of a cell of 30 chains (density 1.057 g/cm<sup>3</sup>).

**Table S3.** Forcite Geometry Optimization — cell optimization.

| Geometry optimization parameters |                  | Energy parameters   |       |                         |            |
|----------------------------------|------------------|---------------------|-------|-------------------------|------------|
| Algorithm                        | Smart            | Forcefield          |       | COMPASSII (Version 1.1) |            |
| Convergence tolerance            |                  | Charges             |       | Forcefield assigned     |            |
| Energy                           | 2e-005 kcal/mol  | Electrostatic terms |       | van der Waals terms     |            |
| Force                            | 0.001 kcal/mol/Å | Summation method    | Ewald | Summation method        | Atom based |

|                              |       |              |                |                       |              |
|------------------------------|-------|--------------|----------------|-----------------------|--------------|
| Maximum number of iterations | 500   | Accuracy     | 0.001 kcal/mol | Truncation method     | Cubic spline |
| External pressure            | 0 GPa | Buffer width | 0.5 Å          | Cutoff distance       | 18.5 Å       |
| Motion groups rigid          | NO    |              |                | Spline width          | 1 Å          |
| Optimize cell                | NO    |              |                | Long range correction | YES          |
|                              |       |              |                | Buffer width          | 0.5 Å        |

**Table S4.** Forcite Anneal – MD relaxing the chain.

| Anneal parameters              |          | Dynamics parameters |              |
|--------------------------------|----------|---------------------|--------------|
| Number of anneal cycles        | 5        | Ensemble            | NVT          |
| Initial temperature            | 300.00 K | Control method      | NHL          |
| Mid-cycle temperature          | 500.00 K | Q ratio             | 0.0100000    |
| Heating ramps per cycle        | 5        | Decay constant      | 1.0000000 ps |
| Dynamics steps per ramp        | 100      | Timestep            | 1.00 fs      |
| Total number of dynamics steps | 5000     | Initial velocities  | Random       |
| Optimize annealed structure    | False    |                     |              |

**Table S5.** Forcite Dynamics – MD relaxing the cell.

| Dynamics parameters |                 | Energy parameters     |                         |
|---------------------|-----------------|-----------------------|-------------------------|
| Ensemble            | NPT             | Forcefield            | COMPASSII (Version 1.1) |
| Temperature         | 298.00 K        | Charges               | Forcefield assigned     |
| Control method      | NHL             | Electrostatic terms   |                         |
| Q ratio             | 0.0100000       | Summation method      | Ewald                   |
| Decay constant      | 1.0000000 ps    | Accuracy              | 0.0001 kcal/mol         |
| Pressure            | 0,000101325 GPa | Buffer width          | 0.5 Å                   |
| Control method      | Parrinello      | van der Waals terms   |                         |
| Cell time constant  | 1.0000000 ps    | Summation method      | Atom based              |
| Timestep            | 1.00 fs         | Truncation method     | Cubic spline            |
| Number of steps     | 1000000         | Cutoff distance       | 15.5 Å                  |
| Duration            | 1000 ps         | Spline width          | 1 Å                     |
| Initial velocities  | Random          | Long range correction | YES                     |
|                     |                 | Buffer width          | 0.5 Å                   |

**Table S6.** Sorption Fixed pressure – GCMC saturation with water vapor.

| Fixed pressure calculation parameters | Metropolis parameters | Monte Carlo method | Fixed pressure calculation parameters |
|---------------------------------------|-----------------------|--------------------|---------------------------------------|
| Monte Carlo method                    | Metropolis            | Parameter          | Ratio                                 |
|                                       |                       | Maximum amplitude  | Sorbate                               |
| Equilibration steps                   | 100000                | Exchange           | 2.000                                 |
| Production steps                      | 8000000               | Rotate             | 1.000                                 |
| Sample interval                       | 25 steps              | Translate          | 1.000                                 |
|                                       |                       | Regrowth           | 0.100                                 |

**Table S7.** Sorption Fixed pressure – GCMC predicting the loading (with and without water).

| Fixed pressure calculation parameters | Metropolis parameters | Monte Carlo method | Fixed pressure calculation parameters |
|---------------------------------------|-----------------------|--------------------|---------------------------------------|
| Monte Carlo method                    | Metropolis            | Parameter          | Ratio                                 |
|                                       |                       | Maximum amplitude  | Sorbate                               |
| Equilibration steps                   | 100000                | Exchange           | 2.000                                 |
| Production steps                      | 8000000               | Rotate             | 1.000                                 |
| Sample interval                       | 25 steps              | Translate          | 1.000                                 |
|                                       |                       | Regrowth           | 0.100                                 |

**Table S8.** Forcite Dynamics – MD calculating the mean square displacement molecules (with and without water).

| Dynamics parameters | Energy parameters     |
|---------------------|-----------------------|
| Ensemble            | NPT                   |
| Temperature         | 298.00 K              |
| Control method      | NHL                   |
| Q ratio             | 0.0100000             |
| Decay constant      | 1.0000000 ps          |
| Pressure            | 0,0002 GPa            |
| Control method      | Parrinello            |
| Cell time constant  | 1.0000000 ps          |
| Timestep            | 1.00 fs               |
| Number of steps     | 1000000               |
| Duration            | 1000 ps               |
| Initial velocities  | Random                |
|                     | Forcefield            |
|                     | Charges               |
|                     | Electrostatic terms   |
|                     | Summation method      |
|                     | Accuracy              |
|                     | Buffer width          |
|                     | van der Waals terms   |
|                     | Summation method      |
|                     | Truncation method     |
|                     | Cutoff distance       |
|                     | Spline width          |
|                     | Long range correction |
|                     | Buffer width          |

The gas solubility in the polymer was calculated by simulating GCMC at a fixed pressure and determining the average number of gas molecules in the material. This allows to calculate the gas solubility coefficient as:

$$S_i = \frac{\langle N_i \rangle}{N_A p_i V} \quad (\text{S1})$$

The gas diffusivity in the polymer was calculated by running a molecular dynamics simulation and determining the mean square displacement of the gas in the material. This allows you to calculate the self-diffusivity coefficient of the gas and gives an insight into the overall diffusivity. The mean square displacement of the particles with respect to their original position is obtained as the second moment of their distribution at  $t > 0$ , and is related to the diffusion coefficient as follows:

$$D_i = \frac{1}{6N_i} \lim_{t \rightarrow \infty} \left( \frac{d\langle [r_i(t) - r_i(0)]^2 \rangle}{dt} \right) \quad (\text{S2})$$

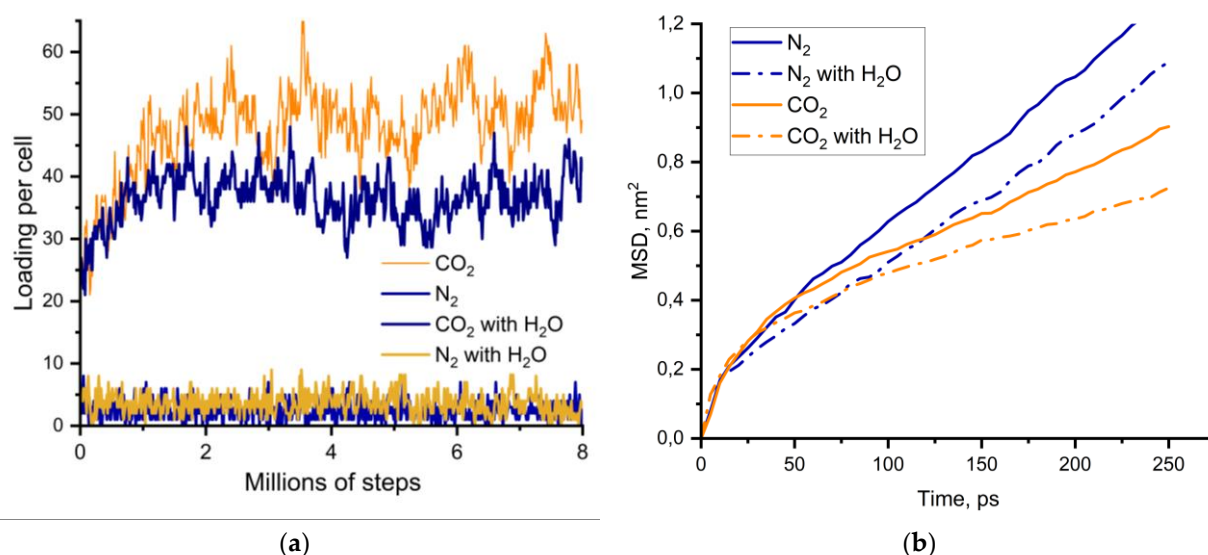

**Figure S4.** (a) Results of GCMC calculations and (b) Mean square displacement of gas molecules.
